1 **Title: Hepatitis E in Kathmandu Valley: Insights from a Representative Longitudinal**  
2 **Serosurvey**

3

4 **Authors**

5 Nishan Katuwal<sup>1,2</sup>, Melina Thapa<sup>1</sup>, Sony Shrestha<sup>1</sup>, Krista Vaidya<sup>1,3</sup>, Isaac I Bogoch<sup>4</sup>,  
6 Jason Andrews<sup>5</sup>, Rajeev Shrestha<sup>1,2</sup>, Dipesh Tamrakar<sup>1,2,6¥</sup>, Kristen Aiemjoy<sup>3,7¥\*</sup>

7

8 1 Research and Development Division, Dhulikhel Hospital, Kathmandu University  
9 Hospital, Nepal

10 2 Center for Infectious Disease Research and Surveillance, Dhulikhel Hospital,  
11 Kathmandu University Hospital, Nepal

12 3 Division of Epidemiology, Department of Public Health Sciences, University of California  
13 Davis School of Medicine, USA

14 4 Department of Medicine, University of Toronto, Canada

15 5 Division of Infectious Diseases and Geographic Medicine, Stanford University School  
16 of Medicine, USA

17 6 Department of Community Medicine, Kathmandu University School of Medical  
18 Sciences, Nepal

19 7 Department of Microbiology and Immunology, Mahidol University Faculty of Tropical  
20 Medicine, Thailand

21

22 **\*Corresponding Author:**

23 Dr. Kristen Aiemjoy

24 Email: [kaiemjoy@ucdavis.edu](mailto:kaiemjoy@ucdavis.edu)

25

26 ¥: equal contribution

27

28

29

30 **ABSTRACT**

31

32 Hepatitis-E virus (HEV), an etiologic agent of acute inflammatory liver disease, is a  
33 significant cause of morbidity and mortality in South Asia. HEV is considered endemic in  
34 Nepal; but data on population-level infection transmission is sparse. We conducted a  
35 representative longitudinal serologic study between February 2019 and April 2021 in  
36 urban and peri-urban areas of central Nepal to characterize community-level HEV  
37 transmission. Individuals were followed up to four times, during which capillary blood  
38 samples were collected on dried blood spots and tested for anti-HEV immunoglobulin-G  
39 antibodies. Analyzing 2513 dried blood samples from 923 participants aged 0-25 years,  
40 we found a seroprevalence of 4.8% and a seroincidence rate of 10.9 per 1000 person-  
41 years. Notably, young adults, including women of childbearing age, faced the highest  
42 incidence of infection. Geospatial analysis identified potential HEV clusters in Kavre and  
43 Kathmandu districts, emphasizing the need for targeted interventions. Water source  
44 played a crucial role in HEV transmission, with individuals consuming surface water facing  
45 the highest risk of seroconversion. Our findings underscore the endemic nature of HEV  
46 in Nepal, emphasizing the importance of safe water practices and potential vaccination  
47 strategies for high-risk groups.

48

49

50

51

52

53

54

55

56

## 57 **BACKGROUND**

58 Hepatitis E Virus (HEV), first identified in 1983, has emerged as the leading cause of  
59 acute clinical hepatitis in South Asia (1). The overall mortality rate associated with HEV  
60 is 1–4% (2). Immunocompromised individuals and pregnant women face the highest risk  
61 for complications and death, with mortality rates reaching up to 20% among pregnant  
62 women in their third trimester (3). The virus is primarily transmitted through food and water  
63 contaminated with infected fecal material, disproportionately affecting individuals in  
64 locations lacking improved sanitation systems (2).

65 HEV is estimated to cause approximately 20 million new infections annually, leading to  
66 around 3.3 million symptomatic cases and 70,000 deaths (4). However, these figures may  
67 be underestimates due to limited surveillance capacity and suboptimal access to  
68 laboratory diagnostics, which often leave many infections, especially pauci-symptomatic  
69 and subclinical cases, undetected and under-reported (5).

70 Sero-epidemiology provides a valuable tool to augment clinical surveillance of HEV,  
71 particularly when diagnostics and reporting systems are limited (6). Population-level sero-  
72 responses also offers insights into exposure that are not biased by access to health care  
73 and care-seeking behaviors (7). Despite the existence of four recognized HEV genotypes,  
74 the antibody responses they elicit are similar (2). IgG antibody responses peak 2–6 weeks  
75 post-infection (8,9) then start to decay. A study of confirmed HEV patients in Nepal found  
76 that IgG responses decayed substantially in the first 6 months but remained elevated  
77 above a seropositivity threshold for at least 14 months (10).

78 Nepal, considered endemic for hepatitis E virus, has experienced repeated outbreaks of  
79 HEV with sporadic cases of acute hepatitis between such outbreaks (11). A study among  
80 individuals seeking orthopedic care in Kathmandu between 2010 and 2012 found an IgG  
81 seroprevalence of 47.1% (12). Among healthy blood donors in Kathmandu in 2014, the  
82 age-adjusted seroprevalence of HEV was 3.2% for IgM and 8.3% for IgG (13). A study  
83 conducted after the 2015 earthquake among blood donors residing in earthquake-  
84 affected areas found a HEV seroprevalence of 3.2% for IgM and 41.9% for IgG (14). Most  
85 previous seroprevalence studies were conducted using convenience samples (healthy

86 blood donors or individuals seeking care in a hospital setting), and it is unknown how well  
87 these estimates represent the general population .

88 To meet this gap, we performed a longitudinal HEV serosurvey among a geographically  
89 random population-based sample of children and young adults residing in Kathmandu  
90 and Kavre districts. The aim was to gain a better understanding of the geographic  
91 distribution of HEV, characterize the incidence, and investigate risk factors related to  
92 exposure.

## 93 **METHODS**

### 94 **Overview**

95 We conducted a representative, population-based longitudinal cohort study in urban  
96 (Kathmandu) and peri-urban (Kavre) areas of Nepal to characterize community-level HEV  
97 incidence. We enrolled geographically random sample of individuals aged 0-25 years  
98 from the catchment areas of Kathmandu Medical College in Kathmandu and Dhulikhel  
99 Hospital in Kavrepalanchok, Nepal from Feb 2019 to Apr 2021(15). Participants were  
100 followed-up three times, approximately 3 months, 6 months, and 12 months after initial  
101 enrollment and consent. During enrollment, relevant demographic data including age,  
102 sex, socioeconomic status, were collected.

### 103 **Sampling method**

104 We employed a systematic random sampling strategy within our defined catchment  
105 areas. We randomly selected grid clusters, enumerated all households within each  
106 cluster, and then randomly selected participants based on age stratification using the  
107 groups 0-4, 5-9, 10-15, and 16-25 years. Our exclusion criteria were minimal to ensure a  
108 representative sample. We only excluded individuals who were not residents of the  
109 catchment area or did not fall within our specified age range at the time of the cross-  
110 sectional survey.

111

112

## 113 **Sample collection**

114 At each visit, we collected capillary blood samples onto filter papers (TropBio FP 05-002-  
115 12) using a finger-prick (dried blood spots; DBS). The samples were dried at room  
116 temperature for 24 hours then stored in individual plastic bags with desiccant at -20 C.

## 117 **Laboratory Methods**

118 We eluted the dried blood spots by submerging a single filled filter paper protrusion in  
119 133  $\mu$ L of 1X PBS containing 0.05% Tween buffer and incubating overnight at 4°C. We  
120 then centrifuged the tubes at 10,000xg and aliquoted the supernatant, considering this  
121 DBS eluate as a 1:10 dilution.

122

123 We analyzed the samples using end-point ELISA with recomWell HEV IgG ELISA kits  
124 (Mikrogen Diagnostik), which evaluate immunoglobulin IgG against the recombinant  
125 HEV-ORF2 antigen. We read the ELISA plates at a wavelength of 450nm (with a  
126 reference wavelength of 690nm) using a Bio-Rad iMark ELISA plate reader.

## 127 **Statistical Analysis**

128

129 We fit 2-component Gaussian finite mixture models to determine an optimal cutoff value,  
130 defined as the mean plus 3.5 standard deviations from the lower mixture component of  
131 the log-transformed values (16). We then calculated seroprevalence as the percentage  
132 of samples that were seropositive at each sampling interval. To describe how  
133 seropositivity changes over age, we fit generalized additive models with a cubic spline for  
134 age (17). We computed simultaneous confidence intervals using a parametric bootstrap  
135 of the variance-covariance matrix of the fitted model parameters (18) (Mara, 2012). To  
136 investigate variables associated with seropositivity, we used mixed-effect binomial logit  
137 models with a random effect for community (19).

138

139 We calculated seroincidence, defined as the number of new seroconversions per 1000  
140 person years, by dividing the number of individuals who seroconverted by the person-  
141 time at risk between measurements. We defined incident seroconversions as a change

142 in IgG across the seropositivity cutoff between sampling intervals. We used negative  
143 binomial mixed-effects regression models to explore the influence of various predictors  
144 on seroincidence, including area, gender, income level, water source, and frequency of  
145 eating outside, while adjusting for age. Each predictor was individually incorporated into  
146 the model, which also accounted for repeated measurements on the same individual  
147 across different visits and individual-level variability. An offset was introduced to adjust  
148 for person-time.

149

## 150 **Ethical Considerations**

151 The study protocol was reviewed and approved by the Nepal Health Research Council  
152 and Ethics Review Board of Dhulikhel Hospital and Stanford University. Written informed  
153 consent was obtained from all participants or their parents or legal guardians in the case  
154 of minors age <18. In addition, we obtained written assent from children between the ages  
155 of 15 and 17. The study was conducted following the principles of the Declaration of  
156 Helsinki.

## 157 **RESULTS**

158 We collected a total of 2513 dried blood samples from 923 study participants between  
159 February 2019 to April 2021. Out of 923 study participants, 401 were from Kathmandu,  
160 197 from Panauti (Kavre), 167 from Banepa (Kavre), 85 from Dhulikhel (Kavre) and 73  
161 from Panchkhal (Kavre). The median age of participants was 11 years (Inter Quartile  
162 Range [IQR]: 5.6 - 17) and 52.2% (482/923) were male. The median number of study  
163 visits completed was 3 (IQR 2-3); 229/923; 65% (603/923) of participants had 3 or more  
164 study visits while 18.2% 168/923 had just 1 study visit and 16.4% 152/923 had 2 study  
165 visits (Table 1).

166

167 From the total of 2513 processed samples from 923 enrolled individuals, 106 samples  
168 (53 individuals) were seropositive for HEV (Figure 1). At the baseline visit, the crude  
169 seroprevalence was 4.8% (44/923) (Table 2). There were 9 incident seroconversions over

170 822.8 years of person-time, yielding a crude seroincidence rate of 10.9 (95% CI 5-20.8)  
171 per 1000 person-years (Table 3). Both seroprevalence and seroincidence increased with  
172 age. Among 0-5 year olds, the seroprevalence was 1.0% (2/199), increasing to 11.1%  
173 (33/297) in the 15 to 25-year-old age group ( $p = 0.001$ ; see Table 2 and Figure 2). The  
174 seroincidence rate rose from 0 (95%CI: 0 - 32) per 1000 person-years for 0 to 5 year-olds  
175 to 9.0 (95%CI: 1 - 32.4) for 5 to 10 year-olds, 14.0 (95%CI: 2.9 - 40.8) for 10 to 15 year-  
176 olds, and 14.8 (95%CI: 4.0 - 37.9) for 15 to 25 year-olds (Table 3). The age-adjusted  
177 seroincidence was similar among females (10.3, 95% CI 2.8 - 26.3) compared to males  
178 (11.6, 95% CI 3.8 - 27.2) (Table 3).

179  
180 Individuals residing in households with a monthly income exceeding 30,000 Nepalese  
181 rupees had a HEV seroprevalence of 4.3% (95% CI 2.5 - 7.5) compared to 1.4% (95% CI  
182 0.7-3.0) for those in households earning below 30,000 Nepalese rupees ( $p = 0.003$ ). The  
183 age-adjusted seroincidence rate for the higher income group was 9.4 (95% CI 3.0 - 30.0)  
184 per 1000 person years, and 7.5 (95% CI 2.4-23.3) for the lower income group.

185  
186 HEV seroprevalence estimates did not vary markedly according to drinking water source,  
187 with a seroprevalence of 2.9% (95% CI 1.3-6.3) among individuals whose primary  
188 drinking water source was surface water, 3.6% (95% CI 1.9 - 6.6) for bottled water, 1.9%  
189 (95%CI: 0.9-3.9) for municipal water, 2.3% (95%CI: 0.9-5.8) for ground water and 0.8%  
190 (95%CI: 0.1-6.3) for a private water company. However, the HEV seroincidence rate  
191 among individuals drinking surface water was higher than the other groups at 24.8  
192 (95%CI: 9.9 – 61.5) per 1000 person-years compared to 5.6 (95% CI: 1.4-22.8) for  
193 municipal water ( $p = 0.076$ ). Of the 9 incident seroconversions, 5 reported drinking  
194 surface water and of these 3 did not treat, 1 treated sometimes (<50% of the time) and 1  
195 reported always treated water by boiling. However, when aggregated there were no  
196 differences in HEV seroprevalence or seroincidence according to whether the household  
197 treated their drinking water or not. Detailed seroprevalence and seroincidence are  
198 provided in Tables 2 and 3.

199 HEV seroprevalence and seroincidence were not geographically uniform. The  
200 seropositive cases are geospatially represented in Figure 2, revealing potential clusters



201 in both Kavre and Kathmandu districts. In Kavre district, seroprevalence was highest in  
202 Banepa 3.5% (95% CI 1.7-7.3) and Panchkal 3.6% (95% CI 1.3-9.9). Within  
203 Kathmandu, seropositive cases were centered in south-west of Tribhuvan airport, the one  
204 incidence seroconversion was also in this area. In Kavre, seroconversions were centered  
205 near Banepa (Figure 2).

## 206 **DISCUSSION**

207 This representative longitudinal serosurvey reveals ongoing HEV exposure in the  
208 Kathmandu Valley of Nepal. With a total of 2513 dried blood samples collected from 923  
209 children and young adults, we observed a seroprevalence of 4.8% and a seroincidence  
210 rate of 10.9 seroconversions per 1000 person-years. These findings are consistent with  
211 the growing body of evidence suggesting that HEV is endemic in many parts of Nepal  
212 (10,11,13,14,20).

213

214 Unlike many enteric infections where the youngest are at the highest risk, our study found  
215 the highest seroincidence among adolescents and young adults. Among those aged 15-  
216 25, 1 in 10 participants had evidence of HEV IgG exposure. This age group is particularly  
217 significant as it encompasses women of childbearing age, where the risks of HEV  
218 complications and mortality peak (3). This aligns with findings from other studies in  
219 Bangladesh (6) and Nepal (20), which reported the highest HEV seroprevalence among  
220 oldest enrolled subjects (70-74 in Bangladesh and 30-39 in Nepal). However, with  
221 seroprevalence, these other studies were limited in their ability to disentangle age and  
222 cohort effects. It's possible that seroprevalence among older ages reflected higher  
223 periods of exposure in the past. In this study, by measuring incident seroconversions, we  
224 were able to characterize a genuine higher risk of exposure with age.

225

226 The clustering of seropositive cases, especially around Banepa in Kavre and the  
227 southwestern region of Tribhuvan airport in Kathmandu, suggests localized outbreaks or  
228 common sources of exposure. The majority of incidence seroconversions in Kavre were  
229 within five kilometers of Banepa – where a high seroprevalence was observed at baseline.  
230 This may suggest propagative transmission from a potential previous outbreak. Such



231 clustering has been observed in other studies (21, 22), and underscores the importance  
232 of targeted public health interventions in these regions.

233  
234 Water source emerged as a significant factor influencing HEV seroincidence. Individuals  
235 consuming surface water exhibited a notably higher seroincidence rate compared to  
236 those relying on other water sources. This finding aligns with previous studies that have  
237 identified contaminated water as a primary transmission route for HEV (21,22). The fact  
238 that a majority of the incident seroconversions were observed in individuals who  
239 consumed untreated or occasionally treated surface water further underscores the  
240 importance of water quality in HEV exposure. The spread of HEV to the environment might  
241 pollute surface waters, which could act as the source of infection for both humans and  
242 animals (23). Moreover, the occurrence of HEV in different water environments, even in  
243 industrialized countries with sanitation and safe water supplies, has been documented,  
244 emphasizing the need for continuous monitoring and intervention (23).

245  
246 This study stands out as one of the few representative longitudinal serosurveys  
247 specifically designed to capture incidence HEV seroconversions alongside HEV  
248 seroprevalence. The variability in seroprevalence estimates across studies, even within  
249 identical regions, is well-documented (24). Some of these discrepancies can be attributed  
250 to methodologies that overlook the age-dependent nature of seroprevalence and/or  
251 ignore antibody decay. Ignoring the waning of antibodies can lead to underestimations of  
252 both seroprevalence and seroincidence, contingent on the rate and pattern of antibody  
253 decay (25). In our study, the seroincidence derived from the age-dependent cross-  
254 sectional visit underestimated the true seroincidence by half. Moreover, seroincidence  
255 measures are particularly valuable in identifying recent exposures that could amplify the  
256 risk of infection and in pinpointing outbreaks. As an illustration, in our study while there  
257 were only minor differences in seroprevalence based on water source, the seroincidence  
258 of HEV among individuals consuming surface water was more than quadruple that of  
259 those drinking municipal water.

260

261 Several limitations are worth noting. Firstly, our cohort did not include individuals above  
262 25 years of age, restricting our ability to comment on the HEV burden in older age groups.  
263 However, prior research has indicated that the most significant HEV burden is among  
264 young adults(6,20). Our use of dried blood samples, though logistically advantageous,  
265 might have increased the limit of detection our serological assays. A recent study  
266 comparing HEV IgG responses in dried blood spots to venous blood reported a sensitivity  
267 of 81% and a specificity of 97% (26). Given this reduced sensitivity, our findings may  
268 underestimate the true HEV seroprevalence and seroincidence by up to 20%.  
269 Additionally, our household sampling strategy could have inadvertently omitted migrant  
270 populations and residents of informal settlements. Such populations, often faced with  
271 subpar water, sanitation, and hygiene conditions, could potentially have a higher HEV  
272 seropositivity rate, potentially further biasing our findings towards the null.

273

274 In summary, our study underscores the endemic nature of HEV in Nepal, revealing  
275 significant variations in seroprevalence and seroincidence based on age, water source,  
276 and geography. These insights emphasize the urgency for targeted public health  
277 strategies, especially in identified clusters, and spotlight the critical role of safe water  
278 practices in curtailing HEV incidence.

279

## 280 **Acknowledgments**

281 We gratefully acknowledge the study participants for their valuable time and interest in  
282 participating in the studies.

283

284

285

286

287

288

289 **Tables**

290 **Table 1: Demographic Characteristics of enrolled individuals**

|                                        | <b>Banepa<br/>(N=167)</b> | <b>Dhulikhel<br/>(N=85)</b> | <b>Kathmandu<br/>(N=401)</b> | <b>Panauti<br/>(N=197)</b> | <b>Panchkhal<br/>(N=73)</b> | <b>Overall<br/>(N=923)</b> |
|----------------------------------------|---------------------------|-----------------------------|------------------------------|----------------------------|-----------------------------|----------------------------|
| <b>Age, in years</b>                   |                           |                             |                              |                            |                             |                            |
| Median (IQR)                           | 10 ( 5.3 - 16)            | 9.5 ( 5.4 - 15)             | 12 ( 6.0 - 18)               | 11 ( 4.8 - 17)             | 10 ( 5.7 - 16)              | 11 ( 5.6 - 17)             |
| Min/Max                                | 1.2 - 27                  | 1.1 - 25                    | 0.90 - 27                    | 0.90 - 27                  | 1.3 - 24                    | 0.90 - 27                  |
| <b>Gender</b>                          |                           |                             |                              |                            |                             |                            |
| Female                                 | 82 (49.1%)                | 41 (48.2%)                  | 183 (45.6%)                  | 92 (46.7%)                 | 33 (45.2%)                  | 431 (46.7%)                |
| Male                                   | 83 (49.7%)                | 43 (50.6%)                  | 214 (53.4%)                  | 102 (51.8%)                | 40 (54.8%)                  | 482 (52.2%)                |
| Missing                                | 2 (1.2%)                  | 1 (1.2%)                    | 4 (1.0%)                     | 3 (1.5%)                   | 0 (0%)                      | 10 (1.1%)                  |
| <b>Number of study visits</b>          |                           |                             |                              |                            |                             |                            |
| Median (IQR)                           | 3.0 ( 3.0 - 4.0)          | 4.0 ( 3.0 - 4.0)            | 2.0 ( 1.0 - 3.0)             | 3.0 ( 2.0 - 4.0)           | 3.0 ( 3.0 - 3.0)            | 3.0 ( 2.0 - 3.0)           |
| Min/Max                                | 1.0 - 4.0                 | 1.0 - 4.0                   | 1.0 - 4.0                    | 1.0 - 4.0                  | 1.0 - 4.0                   | 1.0 - 4.0                  |
| <b>Monthly income, Nepalese rupees</b> |                           |                             |                              |                            |                             |                            |
| < 15000                                | 11 (6.6%)                 | 13 (15.3%)                  | 34 (8.5%)                    | 30 (15.2%)                 | 12 (16.4%)                  | 100 (10.8%)                |
| 15000-30000                            | 47 (28.1%)                | 26 (30.6%)                  | 116 (28.9%)                  | 94 (47.7%)                 | 29 (39.7%)                  | 312 (33.8%)                |
| 30000-50000                            | 49 (29.3%)                | 23 (27.1%)                  | 119 (29.7%)                  | 33 (16.8%)                 | 13 (17.8%)                  | 237 (25.7%)                |
| >50000                                 | 17 (10.2%)                | 8 (9.4%)                    | 55 (13.7%)                   | 9 (4.6%)                   | 6 (8.2%)                    | 95 (10.3%)                 |
| Missing                                | 43 (25.7%)                | 15 (17.6%)                  | 77 (19.2%)                   | 31 (15.7%)                 | 13 (17.8%)                  | 179 (19.4%)                |
| <b>Primary water source</b>            |                           |                             |                              |                            |                             |                            |
| Municipal                              | 88 (52.7%)                | 75 (88.2%)                  | 116 (28.9%)                  | 34 (17.3%)                 | 13 (17.8%)                  | 326 (35.3%)                |
| Bottled                                | 33 (19.8%)                | 0 (0%)                      | 210 (52.4%)                  | 0 (0%)                     | 3 (4.1%)                    | 246 (26.7%)                |
| Ground                                 | 5 (3.0%)                  | 2 (2.4%)                    | 27 (6.7%)                    | 55 (27.9%)                 | 40 (54.8%)                  | 129 (14.0%)                |
| Private                                | 4 (2.4%)                  | 0 (0%)                      | 36 (9.0%)                    | 0 (0%)                     | 0 (0%)                      | 40 (4.3%)                  |
| Surface                                | 35 (21.0%)                | 7 (8.2%)                    | 7 (1.7%)                     | 105 (53.3%)                | 17 (23.3%)                  | 171 (18.5%)                |
| Missing                                | 2 (1.2%)                  | 1 (1.2%)                    | 5 (1.2%)                     | 3 (1.5%)                   | 0 (0%)                      | 11 (1.2%)                  |
| <b>Treat water before drinking</b>     |                           |                             |                              |                            |                             |                            |
| No                                     | 65 (38.9%)                | 58 (68.2%)                  | 190 (47.4%)                  | 109 (55.3%)                | 50 (68.5%)                  | 472 (51.1%)                |
| Yes                                    | 100 (59.9%)               | 26 (30.6%)                  | 206 (51.4%)                  | 85 (43.1%)                 | 23 (31.5%)                  | 440 (47.7%)                |
| Missing                                | 2 (1.2%)                  | 1 (1.2%)                    | 5 (1.2%)                     | 3 (1.5%)                   | 0 (0%)                      | 11 (1.2%)                  |

291

292

293

294

295

296

297 Table 2: HEV Seroprevalence at baseline visit

| levels                                            | N() | N seropositive | Crude seroprevalence | Modeled seroprevalence (95% CI) | p value |
|---------------------------------------------------|-----|----------------|----------------------|---------------------------------|---------|
| Overall                                           | 923 | 44             | 4.8%                 | •                               | •       |
| <b>Age, categorical</b>                           |     |                |                      |                                 |         |
| 0-<5                                              | 199 | 2              | 1.0%                 | 1.0% (0.3-3.9)                  | •       |
| 5-<10                                             | 204 | 2              | 1.0%                 | 1.0% (0.2-3.8)                  | 0.980   |
| 10-<15                                            | 223 | 7              | 3.1%                 | 3.1% (1.5-6.4)                  | 0.151   |
| 15-25                                             | 297 | 33             | 11.1%                | 11.1% (8.0-15.2)                | 0.001   |
| <b>City/town*</b>                                 |     |                |                      |                                 |         |
| Banepa                                            | 167 | 10             | 6.0%                 | 3.5% (1.7-7.3)                  | Ref     |
| Dhulikhel                                         | 85  | 1              | 1.2%                 | 0.7% (0.1-5.3)                  | 0.139   |
| Kathmandu                                         | 401 | 19             | 4.7%                 | 2.3% (1.2-4.1)                  | 0.279   |
| Panauti                                           | 197 | 10             | 5.1%                 | 2.7% (1.3-5.7)                  | 0.583   |
| Panchkhal                                         | 73  | 4              | 5.5%                 | 3.6% (1.3-9.9)                  | 0.973   |
| <b>Gender*</b>                                    |     |                |                      |                                 |         |
| Female                                            | 431 | 19             | 4.4%                 | 2.4% (1.3-4.3)                  | Ref     |
| Male                                              | 482 | 24             | 5.0%                 | 2.7% (1.5-4.6)                  | 0.725   |
| <b>Household monthly income, Nepalese rupees*</b> |     |                |                      |                                 |         |
| <30000                                            | 412 | 10             | 2.4%                 | 1.4% (0.7-2.9)                  | Ref     |
| >30000                                            | 332 | 26             | 7.8%                 | 4.3% (2.5-7.4)                  | 0.003   |
| <b>Primary water source*</b>                      |     |                |                      |                                 |         |
| Municipal                                         | 326 | 11             | 3.4%                 | 1.9% (0.9-3.9)                  | Ref     |
| Bottled                                           | 246 | 17             | 6.9%                 | 3.6% (1.9-6.6)                  | 0.119   |
| Ground                                            | 129 | 5              | 3.9%                 | 2.3% (0.9-5.8)                  | 0.760   |
| Private                                           | 40  | 1              | 2.5%                 | 0.8% (0.1-6.3)                  | 0.432   |
| Surface                                           | 171 | 9              | 5.3%                 | 2.9% (1.3-6.3)                  | 0.368   |
| <b>Household treats drinking water*</b>           |     |                |                      |                                 |         |
| No                                                | 472 | 18             | 3.8%                 | 2.1% (1.2-3.8)                  | Ref     |
| Yes                                               | 440 | 25             | 5.7%                 | 3.0% (1.7-5.1)                  | 0.286   |

Note:

\*Mixed effect models adjusted for age with a random effect for city/town

298

299

300 Table 3: HEV Seroincidence

|                                                   | Incident seroconversions | Person-years | Seroincidence rate per 100,000 person-years |                        |          |
|---------------------------------------------------|--------------------------|--------------|---------------------------------------------|------------------------|----------|
|                                                   |                          |              | Seroconversions/person-time                 | Modeled seroincidence* | p-value* |
| Overall                                           | 9                        | 822.8        | 10.9 (5.0-20.8)                             | 10.3 (5.3-19.7)        | •        |
| <b>Age, categorical</b>                           |                          |              |                                             |                        |          |
| 0-<5                                              | 0                        | 115.2        | 0.0 (0.0-32.0)                              | 0.00 (0.00-0.31)       | •        |
| 5-<10                                             | 2                        | 222.7        | 9.0 (1.1-32.4)                              | 8.73 (2.19-34.89)      | Ref      |
| 10-<15                                            | 3                        | 214.7        | 14.0 (2.9-40.8)                             | 13.46 (4.34-41.71)     | 0.019    |
| 15-25                                             | 4                        | 270.2        | 14.8 (4.0-37.9)                             | 13.08 (4.91-34.84)     | 0.019    |
| <b>City/town*</b>                                 |                          |              |                                             |                        |          |
| Banepa                                            | 2                        | 170.5        | 11.7 (1.4-42.4)                             | 10.5 (2.6-42.6)        | Ref      |
| Dhulikhel                                         | 2                        | 106.9        | 18.7 (2.3-67.6)                             | 17.1 (4.2-69.2)        | 0.625    |
| Kathmandu                                         | 1                        | 247.6        | 4.0 (0.1-22.5)                              | 3.4 (0.5-24.5)         | 0.355    |
| Panauti                                           | 4                        | 208.9        | 19.1 (5.2-49.0)                             | 16.8 (6.1-46.3)        | 0.588    |
| Panchkhal                                         | 0                        | 89.0         | 0.0 (0.0-41.4)                              | •                      | 1.000    |
| <b>Gender*</b>                                    |                          |              |                                             |                        |          |
| Female                                            | 4                        | 389.8        | 10.3 (2.8-26.3)                             | 8.9 (3.2-24.7)         | Ref      |
| Male                                              | 5                        | 429.4        | 11.6 (3.8-27.2)                             | 10.3 (4.2-25.5)        | 0.831    |
| <b>Household monthly income, Nepalese rupees*</b> |                          |              |                                             |                        |          |
| <30000                                            | 3                        | 381.6        | 7.9 (1.6-23.0)                              | 7.5 (2.4-23.3)         | Ref      |
| >30000                                            | 3                        | 283.5        | 10.6 (2.2-30.9)                             | 9.4 (3.0-30.0)         | 0.779    |
| <b>Primary water source*</b>                      |                          |              |                                             |                        |          |
| Municipal                                         | 2                        | 320.7        | 6.2 (0.8-22.5)                              | 5.6 (1.4-22.8)         | Ref      |
| Bottled                                           | 1                        | 157.7        | 6.3 (0.2-35.3)                              | 5.3 (0.7-38.2)         | 0.958    |
| Ground                                            | 1                        | 138.0        | 7.2 (0.2-40.4)                              | 6.5 (0.9-46.8)         | 0.903    |
| Private                                           | 0                        | 26.1         | 0.0 (0.0-141.3)                             | •                      | 1.000    |
| Surface                                           | 5                        | 176.7        | 28.3 (9.2-66.0)                             | 24.8 (10.0-61.5)       | 0.076    |
| <b>Household treats drinking water*</b>           |                          |              |                                             |                        |          |
| No                                                | 5                        | 442.4        | 11.3 (3.7-26.4)                             | 10.1 (4.1-24.9)        | Ref      |
| Yes                                               | 4                        | 376.8        | 10.6 (2.9-27.2)                             | 9.1 (3.3-25.3)         | 0.879    |

Note:

\*Mixed effect poisson model adjusted for age and repeated measures

301

302

303 **Figures**

304 **Figure 1: Quantitative antibody responses by date and study site location**

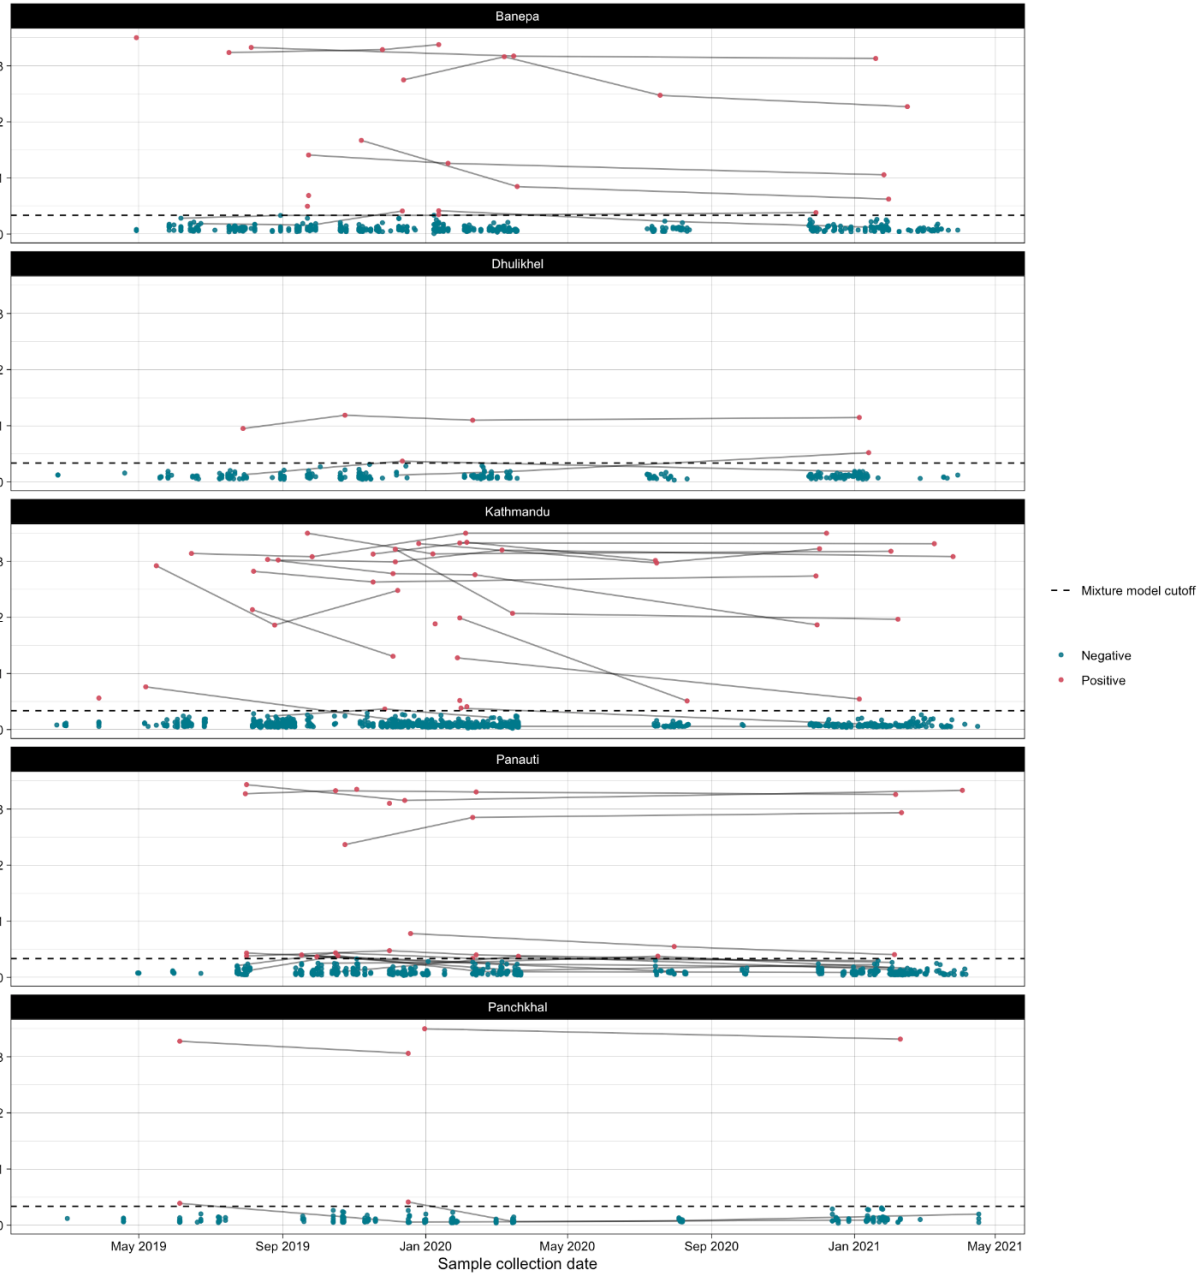

305

306

307

308 Figure 2: Age-dependent Seroprevalence

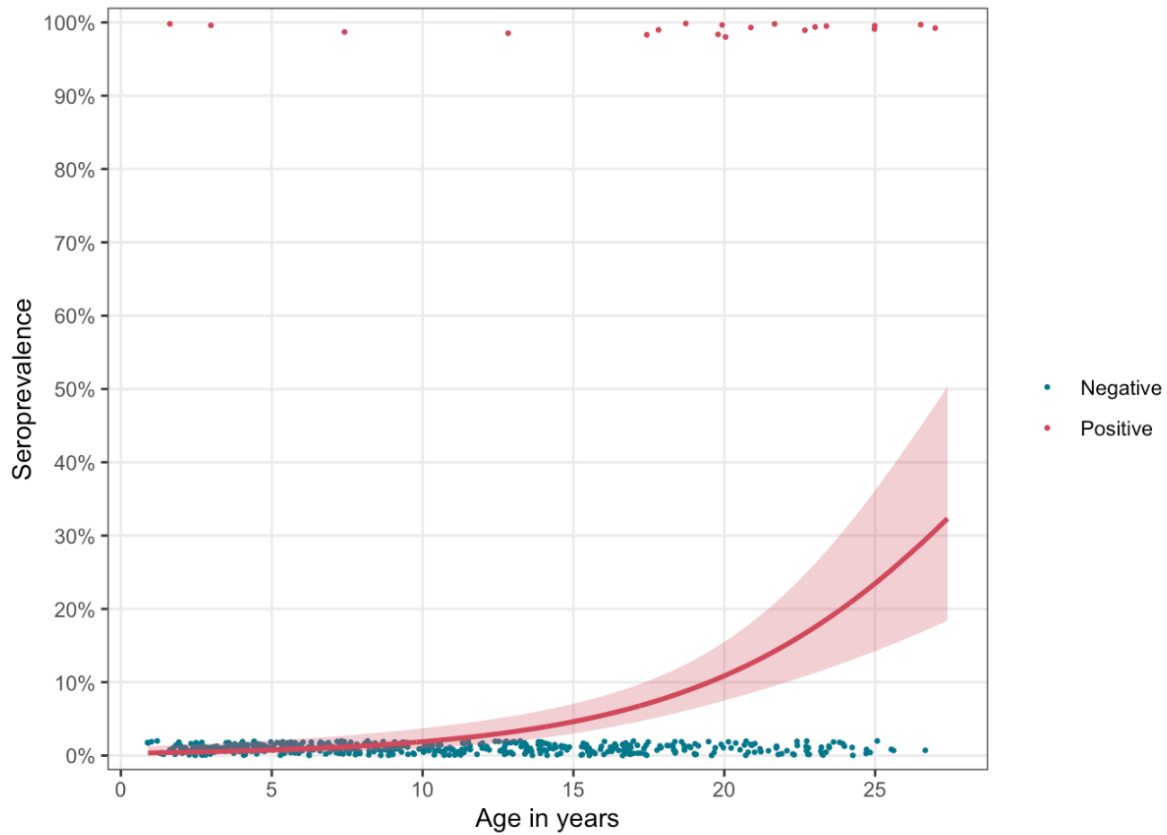

309

310 Figure 3: HEV Seroprevalence at baseline and prospective seroconversions across the  
311 enrollment areas (Banepa, Panauti, Dhulikhel, Panchkhal: Kavre and Kathmandu) and  
312 over the enrollment period of Feb 2019 to Apr 2021

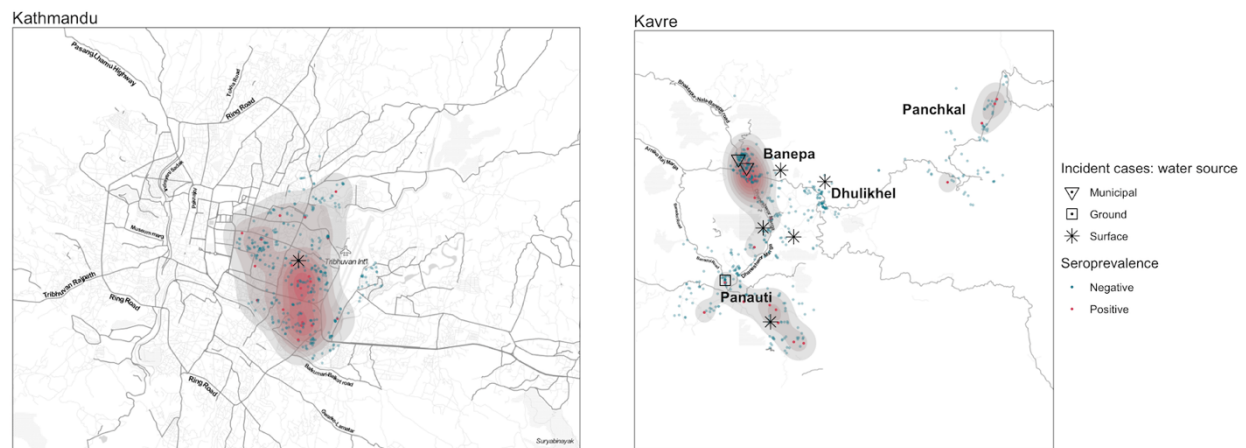

313



314 **REFERENCES**

- 315 1. Jindal A, Sarin SK. Epidemiology of liver failure in Asia-Pacific region. *Liver*  
316 *International*. 2022;42(9):2093–109.
- 317 2. Kamar N, Bendall R, Legrand-Abravanel F, Xia NS, Ijaz S, Izopet J, et al. Hepatitis E.  
318 *The Lancet*. 2012 Jun 30;379(9835):2477–88.
- 319 3. Navaneethan U, Al Mohajer M, Shata MT. Hepatitis E and pregnancy: understanding  
320 the pathogenesis. *Liver International*. 2008;28(9):1190–9.
- 321 4. Rein DB, Stevens GA, Theaker J, Wittenborn JS, Wiersma ST. The global burden of  
322 hepatitis E virus genotypes 1 and 2 in 2005. *Hepatology*. 2012;55(4):988–97.
- 323 5. Aggarwal R, Naik S. Epidemiology of hepatitis E: Current status. *Journal of*  
324 *Gastroenterology and Hepatology*. 2009;24(9):1484–93.
- 325 6. Azman AS, Paul KK, Bhuiyan TR, Koyuncu A, Salje H, Qadri F, et al. Hepatitis E in  
326 Bangladesh: Insights From a National Serosurvey. *The Journal of Infectious*  
327 *Diseases*. 2021 Dec 15;224(Supplement\_7):S805–12.
- 328 7. Aiemjoy K, Seidman JC, Charles RC, Andrews JR. Seroepidemiology for Enteric  
329 Fever: Emerging Approaches and Opportunities. *Open Forum Infectious Diseases*.  
330 2023 May 1;10(Supplement\_1):S21–5.
- 331 8. Kmush BL, Yu H, Huang S, Zhang X, Wu T, Nelson KE, et al. Long-term Antibody  
332 Persistence After Hepatitis E Virus Infection and Vaccination in Dongtai, China. *Open*  
333 *Forum Infect Dis*. 2019 Mar 28;6(4):ofz144.
- 334 9. Huang S, Zhang X, Jiang H, Yan Q, Ai X, Wang Y, et al. Profile of Acute Infectious  
335 Markers in Sporadic Hepatitis E. *PLOS ONE*. 2010 Oct 21;5(10):e13560.
- 336 10. Myint KSA, Endy TP, Shrestha MP, Shrestha SK, Vaughn DW, Innis BL, et al.  
337 Hepatitis E antibody kinetics in Nepalese patients☆. *Transactions of The Royal*  
338 *Society of Tropical Medicine and Hygiene*. 2006 Oct 1;100(10):938–41.
- 339 11. Shrestha S. Hepatitis E in Nepal. *Kathmandu University medical journal (KUMJ)*. 2006  
340 Oct 1;4:530–44.
- 341 12. Izopet J, Labrique AB, Basnyat B, Dalton HR, Kmush B, Heaney CD, et al. Hepatitis  
342 E virus seroprevalence in three hyperendemic areas: Nepal, Bangladesh and  
343 southwest France. *Journal of Clinical Virology*. 2015 Sep 1;70:39–42.
- 344 13. Gupta BP, Lama TK, Adhikari A, Shrestha A, Rauniyar R, Sapkota B, et al. First report  
345 of hepatitis E virus viremia in healthy blood donors from Nepal. *Virusdisease*. 2016  
346 Sep;27(3):324–6.

- 347 14. Shrestha AC, Flower RLP, Seed CR, Rajkarnikar M, Shrestha SK, Thapa U, et al.  
348 Hepatitis E virus seroepidemiology: a post-earthquake study among blood donors in  
349 Nepal. *BMC Infect Dis*. 2016 Nov 25;16(1):707.
- 350 15. Andrews JR, Vaidya K, Saha S, Yousafzai MT, Hemlock C, Longley A, et al.  
351 Healthcare Utilization Patterns for Acute Febrile Illness in Bangladesh, Nepal, and  
352 Pakistan: Results from the Surveillance for Enteric Fever in Asia Project. *Clinical*  
353 *Infectious Diseases*. 2020 Nov 1;71(Supplement\_3):S248–56.
- 354 16. Hens N, Shkedy Z, Aerts M, Faes C, Van Damme P, Beutels P. Modeling infectious  
355 disease parameters based on serological and social contact data: a modern statistical  
356 perspective. Vol. 63. Springer Science & Business Media; 2012.
- 357 17. Wood SN. Generalized additive models: an introduction with R. Chapman and  
358 Hall/CRC; 2006.
- 359 18. Marra G, Wood SN. Coverage properties of confidence intervals for generalized  
360 additive model components. *Scandinavian Journal of Statistics*. 2012;39(1):53–74.
- 361 19. Bates D, Mächler M, Bolker B, Walker S. Fitting Linear Mixed-Effects Models Using  
362 lme4. *Journal of Statistical Software*. 2015 Oct 7;67:1–48.
- 363 20. Clayson ET, Shrestha MP, Vaughn DW, Snitbhan R, Shrestha KB, Longer CF, et al.  
364 Rates of hepatitis E virus infection and disease among adolescents and adults in  
365 Kathmandu, Nepal. *J Infect Dis*. 1997 Sep;176(3):763–6.
- 366 21. Owada K, Sarkar J, Rahman MK, Khan SA, Islam A, Hassan MM, et al.  
367 Epidemiological Profile of a Human Hepatitis E Virus Outbreak in 2018, Chattogram,  
368 Bangladesh. *Trop Med Infect Dis*. 2022 Aug 6;7(8):170.
- 369 22. Lenglet A, Ehlkes L, Taylor D, Fesselet JF, Nassariman JN, Ahamat A, et al. Does  
370 community-wide water chlorination reduce hepatitis E virus infections during an  
371 outbreak? A geospatial analysis of data from an outbreak in Am Timan, Chad (2016–  
372 2017). *Journal of Water and Health*. 2020 Jun 2;18(4):556–65.
- 373 23. Takuissu GR, Kenmoe S, Ndip L, Ebogo-Belobo JT, Kengne-Ndé C, Mbaga DS, et  
374 al. Hepatitis E Virus in Water Environments: A Systematic Review and Meta-analysis.  
375 *Food Environ Virol*. 2022 Sep 1;14(3):223–35.
- 376 24. Hartl J, Otto B, Madden RG, Webb G, Woolson KL, Kriston L, et al. Hepatitis E  
377 Seroprevalence in Europe: A Meta-Analysis. *Viruses*. 2016 Aug;8(8):211.
- 378 25. Teunis PFM, van Eijkeren JCH, de Graaf WF, Marinović AB, Kretzschmar MEE.  
379 Linking the seroresponse to infection to within-host heterogeneity in antibody  
380 production. *Epidemics*. 2016 Sep;16:33–9.

- 381 26. Øverbø J, Aziz A, Zaman K, Julin CH, Qadri F, Stene-Johansen K, et al. Stability and  
382 Feasibility of Dried Blood Spots for Hepatitis E Virus Serology in a Rural Setting.  
383 Viruses. 2022 Nov;14(11):2525.
